# Supplementary material for: Engineered silver nanoparticles in terrestrial environments: a meta-analysis shows that the overall environmental risk is small
Source: Royal Society of Chemistry journal article supplement (doi:10.1039/c8en00486b), 2018-01-01
Supplement: c8en00486b1.pdf [file c8en00486b1.pdf]

## Supplementary Data

### **Engineered silver nanoparticles in terrestrial environments: A meta-analysis shows that the overall environmental risk is small**

Peng Wang<sup>1,\*</sup>, Enzo Lombi<sup>3</sup>, Neal W. Menzies<sup>2</sup>, Fang-Jie Zhao<sup>1</sup>, and Peter M. Kopittke<sup>2</sup>

*<sup>1</sup> College of Resources and Environmental Sciences, Nanjing Agricultural University, Nanjing, Jiangsu 210095, China*

*<sup>2</sup> School of Agriculture and Food Sciences, The University of Queensland, St. Lucia, Queensland 4072, Australia*

*<sup>3</sup> Future Industries Institute, University of South Australia, Mawson Lakes, South Australia 5095, Australia*

\*Corresponding author: Peng Wang, Phone: +86 25 8439 6509, Email: [p.wang3@njau.edu.cn](mailto:p.wang3@njau.edu.cn)

**Table SI.** Reported total silver concentrations in various technical and environmental compartments including sewage sludge, the effluent, in natural and sludge-treated soils, sediments, and waters.

| Compartments                      | Reported total silver concentrations |        |             | References                                         |
|-----------------------------------|--------------------------------------|--------|-------------|----------------------------------------------------|
|                                   | Mean                                 | Median | Range       |                                                    |
| WWTP effluent ( $\mu\text{g/L}$ ) | 69                                   | 0.8    | 0.004-2,500 | Reference <sup>1-12</sup>                          |
| WWTP sludge (mg/kg)               | 281                                  | 17     | 0.1-27,000  | Reference <sup>6, 10, 13-25</sup>                  |
| Water (ng/L)                      | 366                                  | 2.7    | 0.01-38,000 | Reference <sup>2-4, 8, 11, 26-33</sup>             |
| Sediment (mg/kg)                  | 7.4                                  | 0.8    | 0.0003-100  | Reference <sup>6, 8, 11, 29, 34-39</sup>           |
| Sludge-treated soil (mg/kg)       | 12                                   | 12     | 0.1-133     | Reference <sup>1, 10, 16, 22, 23, 25, 29, 40</sup> |

WWTP: waste water treatment plant.

**Table S2.** Reported percentage of silver sulfidated species (%) in both sludge and soils

|                                             | Range (%) | References                             |
|---------------------------------------------|-----------|----------------------------------------|
| <b>Sludge</b>                               |           |                                        |
| Stockpiled biosolid                         | 60-95     | Reference <sup>13, 23</sup>            |
| Pilot WWTP produced sludge                  | 85-100    | Reference <sup>41-48</sup>             |
|                                             |           |                                        |
| <b>Soil</b>                                 |           |                                        |
| Sludge or Ag <sub>2</sub> S-NP treated soil | 87-100    | Reference <sup>23, 43, 48, 49</sup>    |
| Ag-NP treated soil                          | 0-95      | Reference <sup>49-54</sup>             |
| AgNO <sub>3</sub> treated soil              | 0-96      | Reference <sup>49, 51-53, 55, 56</sup> |

WWTP: waste water treatment plant.

**Table S3.** Available silver concentrations in soils and the toxic effect thresholds of various silver forms for seed germination or plant growth.

|                                                  | Range ( $\mu\text{g/L}$ ) | References                              |
|--------------------------------------------------|---------------------------|-----------------------------------------|
| <b>In soils</b>                                  |                           |                                         |
| Water extracted Ag                               | Undetectable to 5         | Reference <sup>43, 48, 57-60</sup>      |
| CaCl <sub>2</sub> /DTPA extracted Ag             | Undetectable to 5         | Reference <sup>23, 43, 48, 51, 61</sup> |
|                                                  |                           |                                         |
| <b>No-observed-effect concentrations (NOECs)</b> |                           |                                         |
| Ag <sub>2</sub> S                                | 100,000 to 771,000        | Reference <sup>62-64</sup>              |
| NanoAg                                           | 67 to 500                 | Reference <sup>64-66</sup>              |
| AgNO <sub>3</sub>                                | 5.38 to 75,000            | Reference <sup>62-64, 66-68</sup>       |
| AgCl                                             | 7,500 to 750,000          | Reference <sup>62, 63</sup>             |
| NaAgS <sub>2</sub> O <sub>3</sub>                | 10,000 to 1000,000        | Reference <sup>62, 63</sup>             |

## References

1. T. Y. Sun, F. Gottschalk, K. Hungerbühler and B. Nowack, Comprehensive probabilistic modelling of environmental emissions of engineered nanomaterials, *Environ. Pollut.*, 2014, **185**, 69-76.
2. N. W. H. Adams and J. R. Kramer, Silver speciation in wastewater effluent, surface waters, and pore waters, *Environmental Toxicology and Chemistry*, 1999, **18**, 2667-2673.
3. M. M. Shafer, J. T. Overdier and D. E. Armstrong, Removal, partitioning, and fate of silver and other metals in wastewater treatment plants and effluent-receiving streams, *Environmental Toxicology and Chemistry*, 1998, **17**, 630-641.
4. L.-S. Wen, P. H. Santschi, G. A. Gill and D. Tang, Silver concentrations in Colorado, USA, watersheds using improved methodology, *Environmental Toxicology and Chemistry*, 2002, **21**, 2040-2051.
5. D. E. Armstrong and M. M. Shafer, in *The 5th international conference proceedings: transport, fate and effects of silver in the environment*, eds. A. W. Andren and T. W. Bober, Sea Grant Institute, University of Wisconsin System, 1997, pp. 37-40.
6. P. E. Lytle, Fate and speciation of silver in publicly owned treatment works, *Environmental Toxicology and Chemistry*, 1984, **3**, 21-30.
7. T. J. Dagon, BIOLOGICAL TREATMENT OF PHOTO PROCESSING EFFLUENTS, *Journal Water Pollution Control Federation*, 1973, **45**, 2123-2135.
8. C. C. Bard, J. J. Murphy, D. L. Stone and C. J. Terhaar, SILVER IN PHOTOPROCESSING EFFLUENTS, *Journal Water Pollution Control Federation*, 1976, **48**, 389-394.
9. S. G. Pavlostathis and S. K. Maeng, Aerobic biodegradation of a silver-bearing photoprocessing wastewater, *Environmental Toxicology and Chemistry*, 1998, **17**, 617-624.
10. S. A. Blaser, M. Scheringer, M. MacLeod and K. Hungerbühler, Estimation of cumulative aquatic exposure and risk due to silver: Contribution of nano-functionalized plastics and textiles, *Sci Total Environ*, 2008, **390**, 396-409.
11. S. N. Luoma, *Silver nanotechnologies and the environment: Old problems or new challenges*, Woodrow Wilson International Center for Scholars: Washington, D.C, 2008.
12. M. J. Eckelman and T. E. Graedel, Silver Emissions and their Environmental Impacts: A Multilevel Assessment, *Environ Sci Technol*, 2007, **41**, 6283-6289.

13. E. Donner, K. Scheckel, R. Sekine, R. S. Popelka-Filcoff, J. W. Bennett, G. Brunetti, R. Naidu, S. P. McGrath and E. Lombi, Non-labile silver species in biosolids remain stable throughout 50 years of weathering and ageing, *Environ. Pollut.*, 2015, **205**, 78-86.
14. A. C. Johnson, M. D. Jürgens, A. J. Lawlor, I. Cisowska and R. J. Williams, Particulate and colloidal silver in sewage effluent and sludge discharged from British wastewater treatment plants, *Chemosphere*, 2014, **112**, 49-55.
15. U. S. EPA, *Targeted national sewage sludge survey: Statistical analysis report*, Washington, DC, 2009.
16. J. Eriksson, *Concentrations of 61 trace elements in sewage sludge, farmyard manure, mineral fertiliser, precipitation and in oil and crops*, Swedish Environmental Protection Agency, Stockholm, Sweden, 2001.
17. B. G. Lottermoser, Pollution source analysis of anaerobically digested municipal sewage sludges, *Fresen Environ Bull*, 1992, **1**, 31-35.
18. P. Venkateswaran, S. Vellaichamy and K. Palanivelu, Speciation of heavy metals in electroplating industry sludge and wastewater residue using inductively coupled plasma, *International Journal of Environmental Science & Technology*, 2007, **4**, 497-504.
19. L. Wu, L. Yang, Z. Wang, M. Cheng, Z. Li, W. Liu, T. Ma, P. Christie and Y. Luo, Uptake of silver by brown rice and wheat in soils repeatedly amended with biosolids, *Sci Total Environ*, 2018, **612**, 94-102.
20. B. G. Lottermoser, Noble metals in municipal sewage sludges of southeastern Australia, *Ambio*, 1995, **24**, 354-357.
21. F. Gottschalk, R. W. Scholz and B. Nowack, Probabilistic material flow modeling for assessing the environmental exposure to compounds: Methodology and an application to engineered nano-TiO<sub>2</sub> particles, *Environ. Model. Software*, 2010, **25**, 320-332.
22. A. Kawasaki, R. Kimura and S. Arai, Rare earth elements and other trace elements in wastewater treatment sludges, *Soil Sci. Plant Nutr.*, 1998, **44**, 433-441.
23. P. Wang, N. W. Menzies, H. Chen, X. Yang, S. P. McGrath, F.-J. Zhao and P. M. Kopittke, Risk of Silver Transfer from Soil to the Food Chain Is Low after Long-Term (20 Years) Field Applications of Sewage Sludge, *Environ Sci Technol*, 2018, DOI: 10.1021/acs.est.8b00204.
24. M. P. Hirsch, Availability of sludge-borne silver to agricultural crops, *Environmental Toxicology and Chemistry*, 1998, **17**, 610-616.

25. R. Eisler, *Handbook of Chemical Risk Assessment: Health hazards to humans, plants, and animals*, Lewis Publishers, Boca Raton, FL, 2000.
26. L. S. Wen, P. H. Santschi, G. A. Gill, C. L. Paternostro and R. D. Lehman, Colloidal and particulate silver in river and estuarine waters of Texas, *Environ Sci Technol*, 1997, **31**, 723-731.
27. G. Benoit, Clean technique measurement of pb, ag, and cd in freshwater: a redefinition of metal pollution, *Environ Sci Technol*, 1994, **28**, 1987-1991.
28. G. Benoit, S. D. Oktay-Marshall, A. Cantu, E. M. Hood, C. H. Coleman, M. O. Corapcioglu and P. H. Santschi, Partitioning of Cu, Pb, Ag, Zn, Fe, Al, and Mn between filter-retained particles, colloids, and solution in six Texas estuaries, *Mar. Chem.*, 1994, **45**, 307-336.
29. G. J. Smith and A. R. Flegal, Silver in San Francisco Bay estuarine waters, *Estuaries*, 1993, **16**, 547.
30. M. A. Ranville and A. R. Flegal, Silver in the North Pacific Ocean, *Geochemistry, Geophysics, Geosystems*, 2005, **6**, Q03M01.
31. S. N. Luoma and D. J. H. Phillips, DISTRIBUTION, VARIABILITY, AND IMPACTS OF TRACE-ELEMENTS IN SAN-FRANCISCO BAY, *Mar. Pollut. Bull.*, 1988, **19**, 413-425.
32. P. E. Lytle, TREATMENT OF PHOTOFINISHING EFFLUENTS USING ROTATING BIOLOGICAL CONTACTORS (RBCS), *Journal of Imaging Technology*, 1984, **10**, 221-226.
33. J. F. Kopp and R. C. Kroner, in *Developments in Applied Spectroscopy: Selected papers from the Eighteenth Annual Mid-America Spectroscopy Symposium Held in Chicago, Illinois May 15-18, 1967*, eds. W. K. Baer, A. J. Perkins and E. L. Grove, Springer US, Boston, MA, 1968, DOI: 10.1007/978-1-4684-8697-1\_23, pp. 339-352.
34. M. Koide, V. F. Hodge, J. S. Yang, M. Stallard, E. G. Goldberg, J. Calhoun and K. K. Bertine, Some comparative marine chemistries of rhenium, gold, silver and molybdenum, *Appl. Geochem.*, 1986, **1**, 705-714.
35. G. W. Bryan, Pollution due to heavy metals and their compounds. *Mar. Ecol., Mar. Ecol.*, 1984, **5**, 1290-1431.
36. S. N. Luoma, Y. B. Ho and G. W. Bryan, Fate, bioavailability and toxicity of silver in estuarine environments, *Mar. Pollut. Bull.*, 1995, **31**, 44-54.
37. C. Gobeil, Silver in sediments from the St. Lawrence River and Estuary and the Saguenay Fjord, *Environ Sci Technol*, 1999, **33**, 2953-2957.

38. J. S. Heiny and C. M. Tate, Concentration, distribution, and comparison of selected trace elements in bed sediment and fish tissue in the South Platte River Basin, USA, 1992-1993, *Archives of Environmental Contamination and Toxicology*, 1997, **32**, 246-259.
39. C. B. Dissanayake, H. J. Tobschall, H. Palme, U. Rast and B. Spettel, THE ABUNDANCE OF SOME MAJOR AND TRACE-ELEMENTS IN HIGHLY POLLUTED SEDIMENTS FROM THE RHINE RIVER NEAR MAINZ, WEST-GERMANY, *Sci Total Environ*, 1983, **29**, 243-260.
40. S. R. Taylor and S. M. McLennan, *The Continental Crust: Its Composition and Evolution*, Oxford, Blackwell, 1985.
41. R. Kaegi, A. Voegelin, B. Sinnet, S. Zuleeg, H. Hagendorfer, M. Burkhardt and H. Siegrist, Behavior of metallic silver nanoparticles in a pilot wastewater treatment plant, *Environ Sci Technol*, 2011, **45**, 3902-3908.
42. E. Lombi, E. Donner, S. Taheri, E. Tavakkoli, Å. K. Jämting, S. McClure, R. Naidu, B. W. Miller, K. G. Scheckel and K. Vasilev, Transformation of four silver/silver chloride nanoparticles during anaerobic treatment of wastewater and post-processing of sewage sludge, *Environ. Pollut.*, 2013, **176**, 193-197.
43. P. Wang, N. W. Menzies, P. G. Dennis, J. Guo, C. Forstner, R. Sekine, E. Lombi, P. Kappen, P. M. Bertsch and P. M. Kopittke, Silver nanoparticles entering soils via the wastewater–sludge–soil pathway pose low risk to plants but elevated cl concentrations increase ag bioavailability, *Environ Sci Technol*, 2016, **50**, 8274-8281.
44. C. Doolette, M. McLaughlin, J. Kirby, D. Batstone, H. Harris, H. Ge and G. Cornelis, Transformation of PVP coated silver nanoparticles in a simulated wastewater treatment process and the effect on microbial communities, *Chemistry Central Journal*, 2013, **7**, 1-18.
45. R. Ma, C. Levard, J. D. Judy, J. M. Unrine, M. Durenkamp, B. Martin, B. Jefferson and G. V. Lowry, Fate of zinc oxide and silver nanoparticles in a pilot wastewater treatment plant and in processed biosolids, *Environ Sci Technol*, 2014, **48**, 104-112.
46. C. Meier, A. Voegelin, A. Pradas del Real, G. Sarret, C. R. Mueller and R. Kaegi, Transformation of silver nanoparticles in sewage sludge during incineration, *Environ Sci Technol*, 2016, **50**, 3503-3510.
47. R. Kaegi, A. Voegelin, B. Sinnet, S. Zuleeg, H. Siegrist and M. Burkhardt, Transformation of AgCl nanoparticles in a sewer system — A field study, *Sci Total Environ*, 2015, **535**, 20-27.



48. A. E. Pradas del Real, H. Castillo-Michel, R. Kaegi, B. Sinnet, V. Magnin, N. Findling, J. Villanova, M. Carrière, C. Santaella, A. Fernández-Martínez, C. Levard and G. Sarret, Fate of Ag-NPs in sewage sludge after application on agricultural soils, *Environ Sci Technol*, 2016, **50**, 1759-1768.
49. R. Sekine, G. Brunetti, E. Donner, M. Khaksar, K. Vasilev, Å. K. Jämting, K. G. Scheckel, P. Kappen, H. Zhang and E. Lombi, Speciation and lability of Ag-, AgCl-, and Ag<sub>2</sub>S-nanoparticles in soil determined by X-ray absorption spectroscopy and diffusive gradients in thin films, *Environ Sci Technol*, 2014, **49**, 897-905.
50. B. P. Colman, C. L. Arnaout, S. Anciaux, C. K. Gunsch, M. F. Hochella, Jr., B. Kim, G. V. Lowry, B. M. McGill, B. C. Reinsch, C. J. Richardson, J. M. Unrine, J. P. Wright, L. Yin and E. S. Bernhardt, Low concentrations of silver nanoparticles in biosolids cause adverse ecosystem responses under realistic field scenario, *PLoS One*, 2013, **8**, e57189.
51. M. Li, P. Wang, F. Dang and D.-M. Zhou, The transformation and fate of silver nanoparticles in paddy soil: effects of soil organic matter and redox conditions, *Environmental Science-Nano*, 2017, **4**, 919-928.
52. Y. Hashimoto, S. Takeuchi, S. Mitsunobu and Y. S. Ok, Chemical speciation of silver (Ag) in soils under aerobic and anaerobic conditions: Ag nanoparticles vs. ionic Ag, *J. Hazard. Mater.*, 2017, **322**, 318-324.
53. A. R. Whitley, C. Levard, E. Oostveen, P. M. Bertsch, C. J. Matocha, F. v. d. Kammer and J. M. Unrine, Behavior of Ag nanoparticles in soil: Effects of particle surface coating, aging and sewage sludge amendment, *Environ. Pollut.*, 2013, **182**, 141-149.
54. W. A. Shoults-Wilson, B. C. Reinsch, O. V. Tsyusko, P. M. Bertsch, G. V. Lowry and J. M. Unrine, Role of Particle Size and Soil Type in Toxicity of Silver Nanoparticles to Earthworms, *Soil Sci. Soc. Am. J.*, 2011, **75**, 365-377.
55. L. Settimio, M. J. McLaughlin, J. K. Kirby, K. A. Langdon, E. Lombi, E. Donner and K. G. Scheckel, Fate and lability of silver in soils: Effect of ageing, *Environ. Pollut.*, 2014, **191**, 151-157.
56. S. Vasileiadis, E. Puglisi, M. Trevisan, K. G. Scheckel, K. A. Langdon, M. J. McLaughlin, E. Lombi and E. Donner, Changes in soil bacterial communities and diversity in response to long-term silver exposure, *FEMS Microbiol. Ecol.*, 2015, **91**, fiv114-fiv114.

57. S. E. Tsiouris, F. A. Aravanopoulos, I. N. Papadoyannis, M. K. Sofoniou, V. F. Samanidou, G. A. Zachariadis and H. I. A. Constantinidou, Soil silver mobility in areas subjected to cloud seeding with AgI, *Fresenius Environ. Bull.*, 2003, **12**, 1059-1063.
58. T. G. and O. T., Concentrations of 60 elements in the soil solution as related to the soil acidity, *European Journal of Soil Science*, 2001, **52**, 151-165.
59. M. B. McBride, B. K. Richards, T. Steenhuis and G. Spiers, LONG-TERM LEACHING OF TRACE ELEMENTS IN A HEAVILY SLUDGE-AMENDED SILTY CLAY LOAM SOIL, *Soil Science*, 1999, **164**, 613-623.
60. J. D. Judy, J. K. Kirby, C. Creamer, M. J. McLaughlin, C. Fiebiger, C. Wright, T. R. Cavagnaro and P. M. Bertsch, Effects of silver sulfide nanomaterials on mycorrhizal colonization of tomato plants and soil microbial communities in biosolid-amended soil, *Environ. Pollut.*, 2015, **206**, 256-263.
61. J. D. Judy, D. H. McNear, C. Chen, R. W. Lewis, O. V. Tsyusko, P. M. Bertsch, W. Rao, J. Stegemeier, G. V. Lowry, S. P. McGrath, M. Durenkamp and J. M. Unrine, Nanomaterials in biosolids inhibit nodulation, shift microbial community composition, and result in increased metal uptake relative to bulk/dissolved metals, *Environ Sci Technol*, 2015, **49**, 8751-8758.
62. H. T. Ratte, Bioaccumulation and toxicity of silver compounds: A review, *Environ. Toxicol. Chem.*, 1999, **18**, 89-108.
63. W. S. Ewell, J. W. Gorsuch, M. Ritter and C. J. Ruffing, in *Proceedings, 1th Argentum International Conference on the Transport, Fate, and Effects of Silver in the Environment*, Madison, WI, USA, 1998.
64. P. Wang, N. W. Menzies, E. Lombi, R. Sekine, F. P. C. Blamey, M. C. Hernandez-Soriano, M. Cheng, P. Kappen, W. J. G. M. Peijnenburg, C. Tang and P. M. Kopittke, Silver sulfide nanoparticles (Ag<sub>2</sub>S-NPs) are taken up by plants and are phytotoxic, *Nanotoxicology*, 2015, **9**, 1041-1049.
65. C. O. Dimkpa, J. E. McLean, N. Martineau, D. W. Britt, R. Haverkamp and A. J. Anderson, Silver nanoparticles disrupt wheat (*Triticum aestivum* L.) growth in a sand matrix, *Environ Sci Technol*, 2012, **47**, 1082-1090.
66. J. Geisler-Lee, Q. Wang, Y. Yao, W. Zhang, M. Geisler, K. Li, Y. Huang, Y. Chen, A. Kolmakov and X. Ma, Phytotoxicity, accumulation and transport of silver nanoparticles by *Arabidopsis thaliana*, *Nanotoxicology*, 2013, **7**, 323-337.

67. P. M. Kopittke, F. P. C. Blamey, B. A. McKenna, P. Wang and N. W. Menzies, Toxicity of metals to roots of cowpea in relation to their binding strength, *Environmental Toxicology and Chemistry*, 2011, **30**, 1827-1833.
68. F. P. C. Blamey, P. M. Kopittke, J. B. Wehr, T. B. Kinraide and N. W. Menzies, Rhizotoxic effects of silver in cowpea seedlings, *Environ. Toxicol. Chem.*, 2010, **29**, 2072-2078.
